# Supplementary material
Source: PubMed Central journal article supplement (PMC8215731)

## Results

1. What is the shortest appropriate surveillance interval to define a person as a RBC-transfusion-dependent (being mindful of possible inaccuracies) in data reporting:

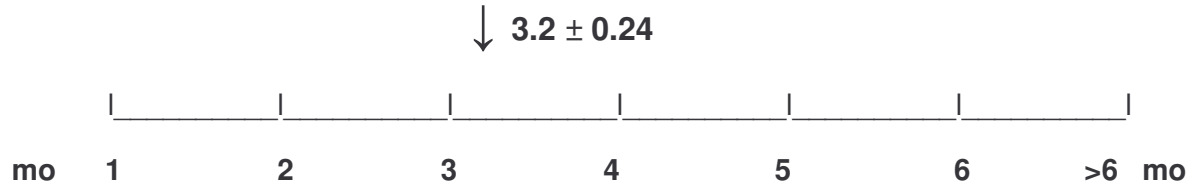

2. For the surveillance interval you selected, what frequency of RBC-transfusions is appropriate to define a person as RBC-transfusion-dependent?

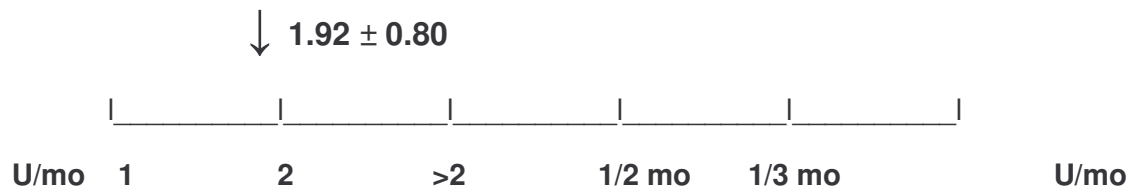

3. What is the shortest appropriate interval of RBC-transfusion-independence to define a person as being RBC-transfusion-independent?

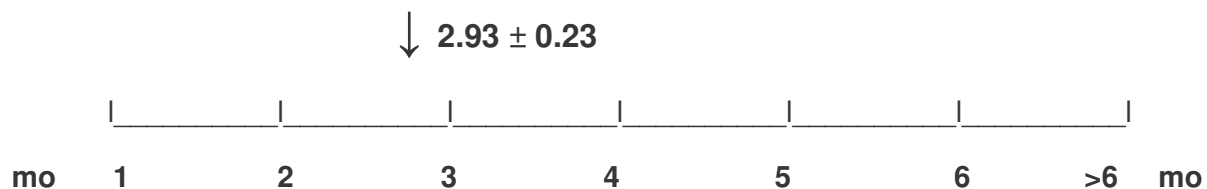

4. Is it appropriate to require a minimum hemoglobin level in addition to RBC-transfusion-independence (as you define above) to define RBC-transfusion-independence?

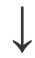

No:  $0.29 \pm 0.22$       Yes:

5. If yes, what untransfused hemoglobin level is most appropriate?

↓  $100 \pm 0$

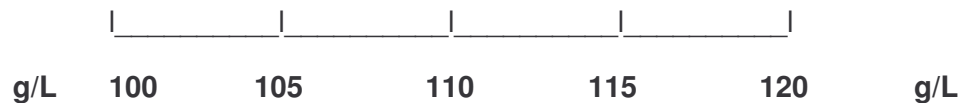

6. Is it appropriate to require a minimum hemoglobin increase from “baseline” in addition to RBC-transfusion-independence (as you define above) to define RBC-transfusion-independence?

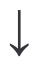

No:  $0.13 \pm 0.11$       Yes:

7. If yes, what minimum hemoglobin level above “baseline” is most appropriate?

↓  $20 \pm 0$

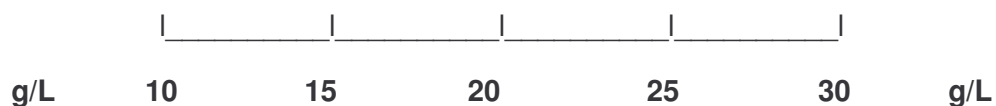

8. Is a reduction in RBC-transfusion frequency a valid endpoint for anemia response?

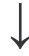

No: Yes:  $0.93 \pm 0.07$

9. If yes, what magnitude of reduction is clinically-important?

↓  $52\% \pm 7$

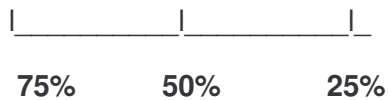

10. At or below what hemoglobin level are RBC-transfusions most appropriately given (choose the nadir value)?

↓  $82 \pm 3$

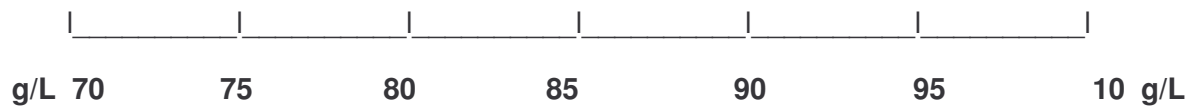

Supplement: NIHMS1698155-supplement-Supplementary_Data_1698155.pdf [file NIHMS1698155-supplement-Supplementary_Data_1698155.pdf]
